# Supplementary material
Source: PubMed Central journal article supplement (PMC5203646)
Supplement: IAI.00824-16_zii999091927s1.pdf [file IAI.00824-16_zii999091927s1.pdf]

## **Supplemental Material**

Six Figures (Figures S1-S6)

Four Tables (Tables S1-4)

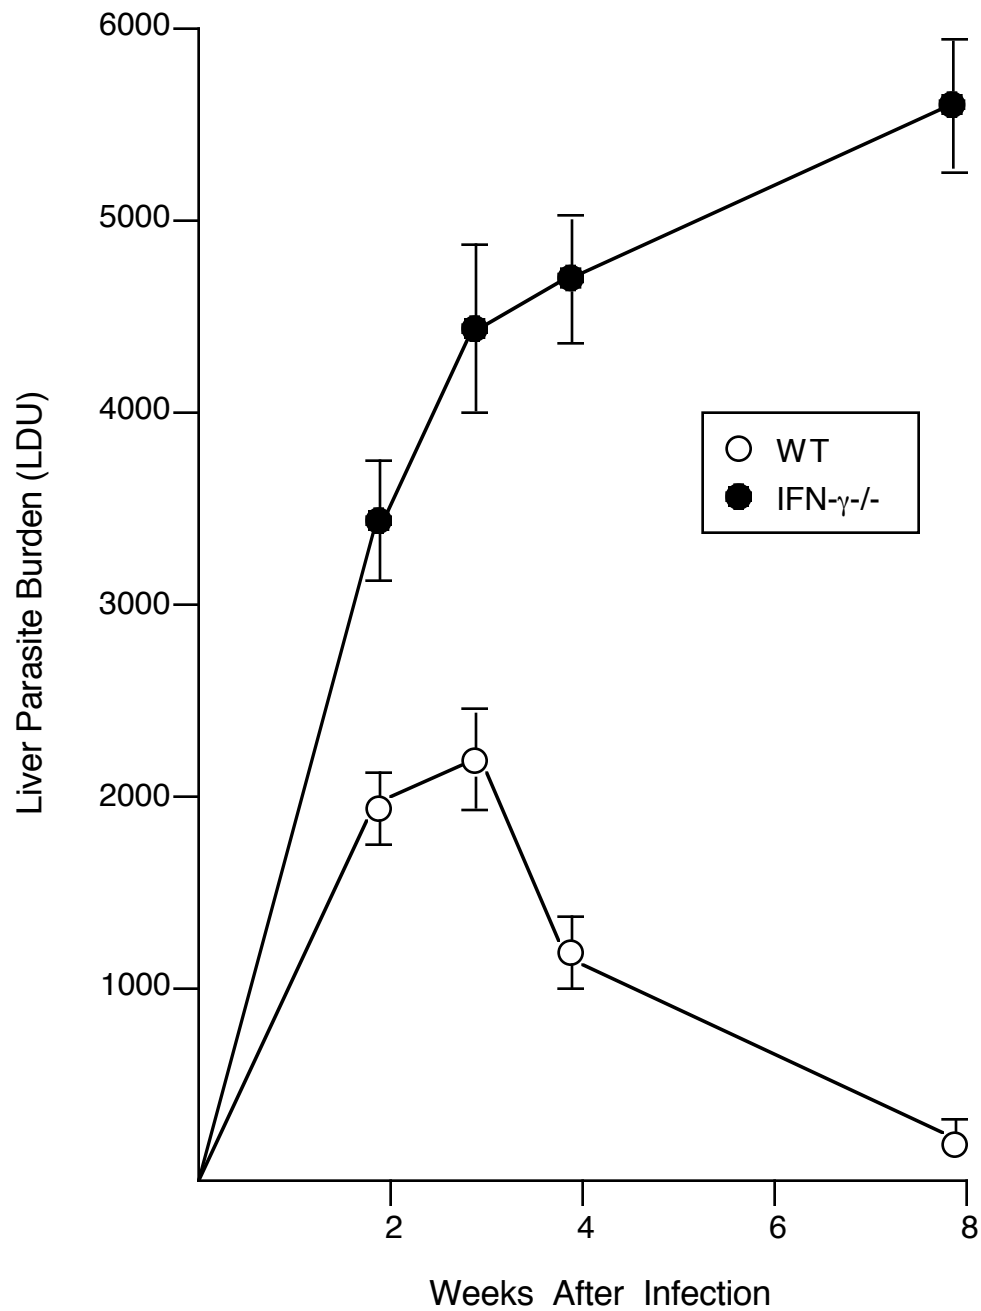

**Figure S1.** Course of *L. donovani* infection 2-8 weeks after challenge in livers of WT and IFN- $\gamma$ <sup>-/-</sup> mice. Results, from 2 experiments, indicate mean  $\pm$  SEM values for 8 mice per group at each time point. \* $p < .05$  for IFN- $\gamma$ <sup>-/-</sup> vs. WT liver parasite burdens (LDU) at all time points.

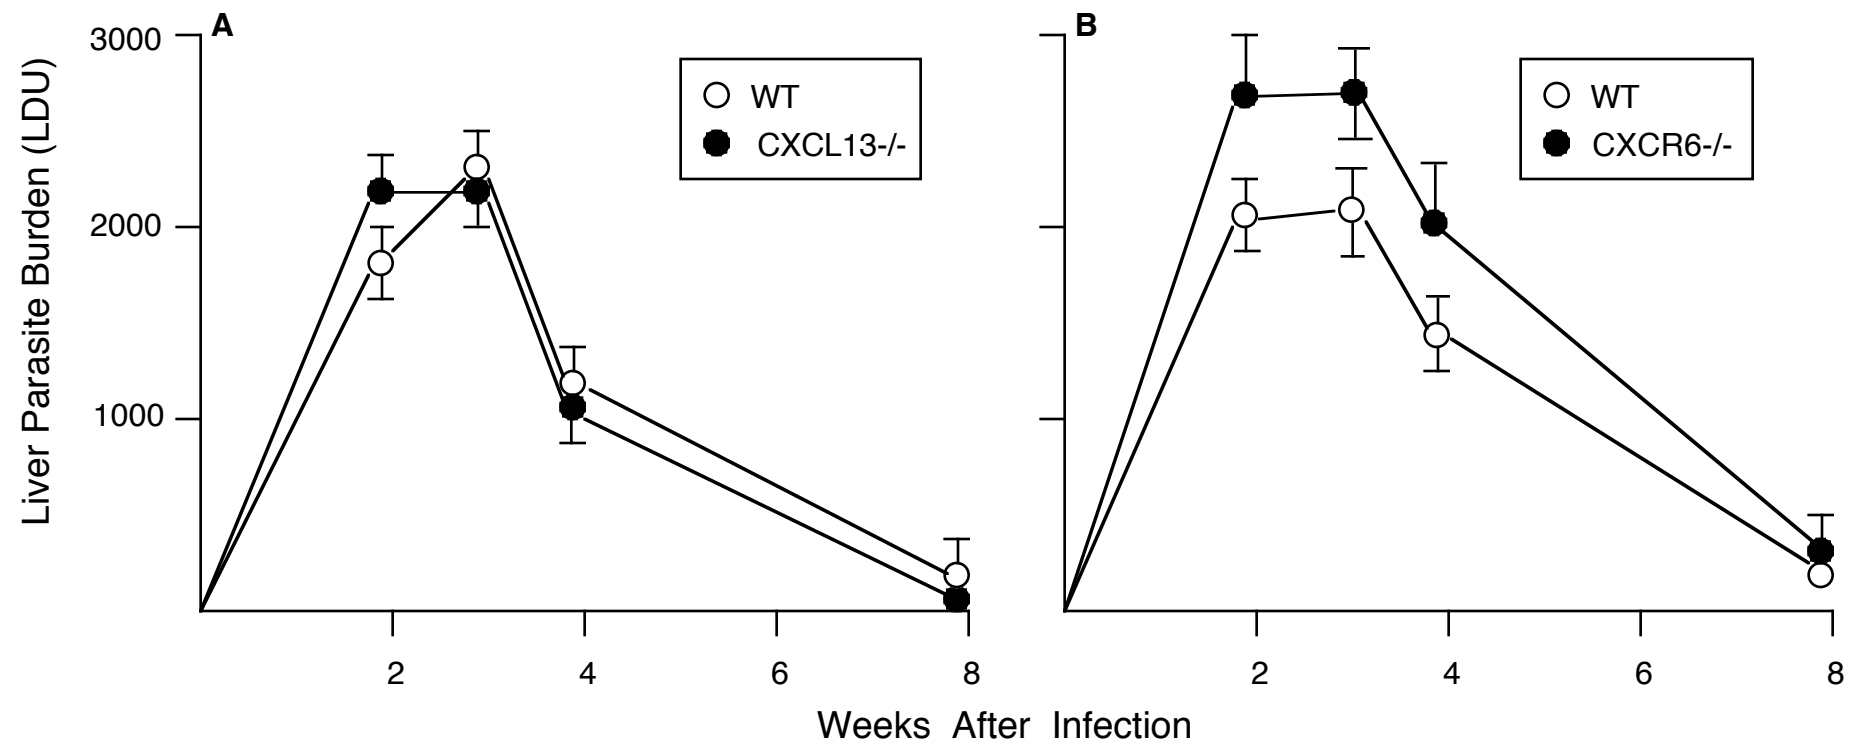

**Figure S2.** Course of *L. donovani* infection 2-8 weeks after challenge in livers of WT, CXCL13<sup>-/-</sup> (A) and CXCR6<sup>-/-</sup> mice (B). Results, from 2 experiments, indicate mean  $\pm$  SEM values for 7-8 mice per group at each time point.

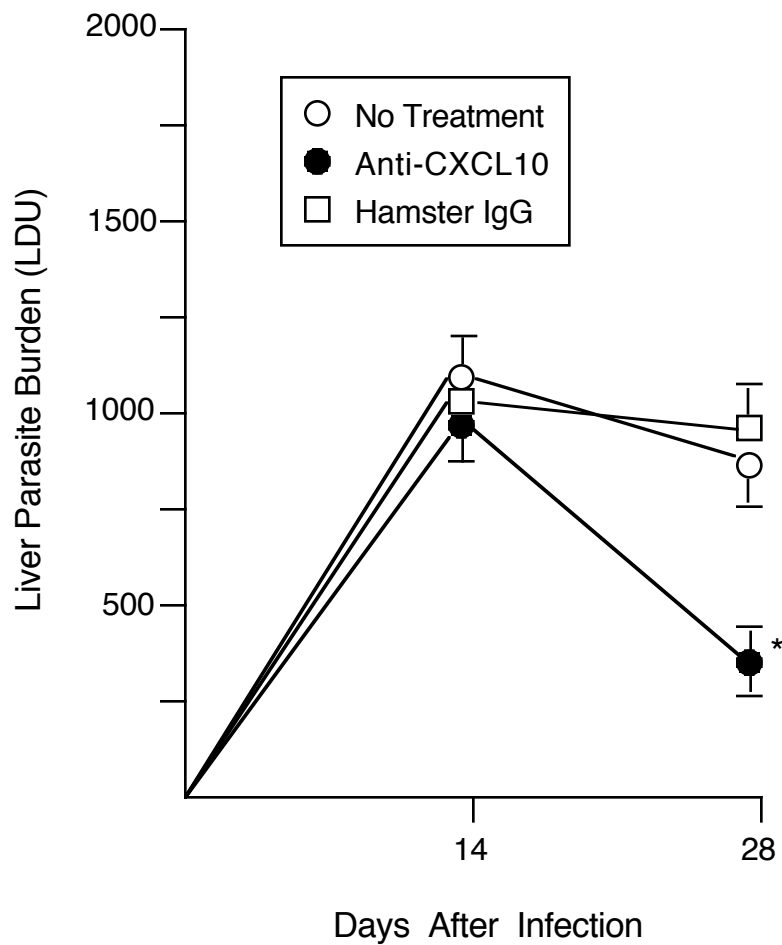

**Figure S3.** Effect of anti-CXCL10 mAb treatment in *L. donovani*-infected WT mice. Starting 4 hours after challenge and on alternate days thereafter to day +26, mice were injected IP with 200 ug of hamster anti-mouse CXCL10 mAb or hamster IgG. Results, from 2 experiments, indicate mean  $\pm$  SEM values for 6-7 mice per group at each time point. \* $p < .05$  vs. untreated and hamster IgG-treated liver parasite burden (LDU).

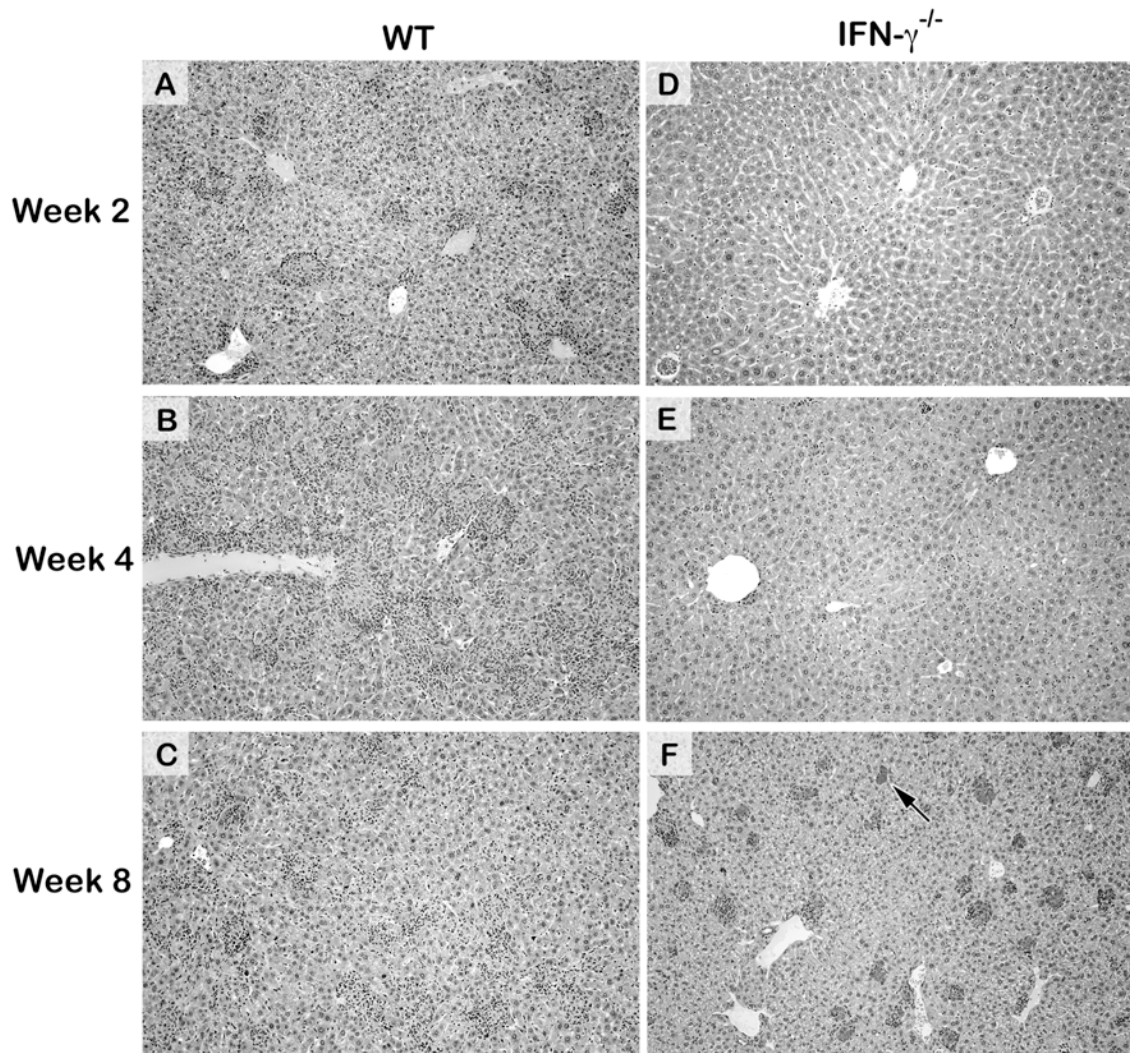

**Figure S4.** Low-power photomicrographs of livers of WT (A-C) and IFN- $\gamma$ <sup>-/-</sup> mice (D-F) 2-8 weeks after infection demonstrating: (i) the intact inflammatory granulomatous reaction in WT mice, expressed at week 2 (A), fully-established at week 4 (B) and maintained but involuting by week 8 (C) vs. (ii) the essentially absent inflammatory response in IFN- $\gamma$ <sup>-/-</sup> mice at both weeks 2 and 4 (D, E) with some mononuclear cell recruitment to heavily-infected foci at week 8 (F). In (F), certain foci (arrows) are comprised of remarkably parasitized Kupffer cells alone (see Figure 4F). Original magnification, x100.

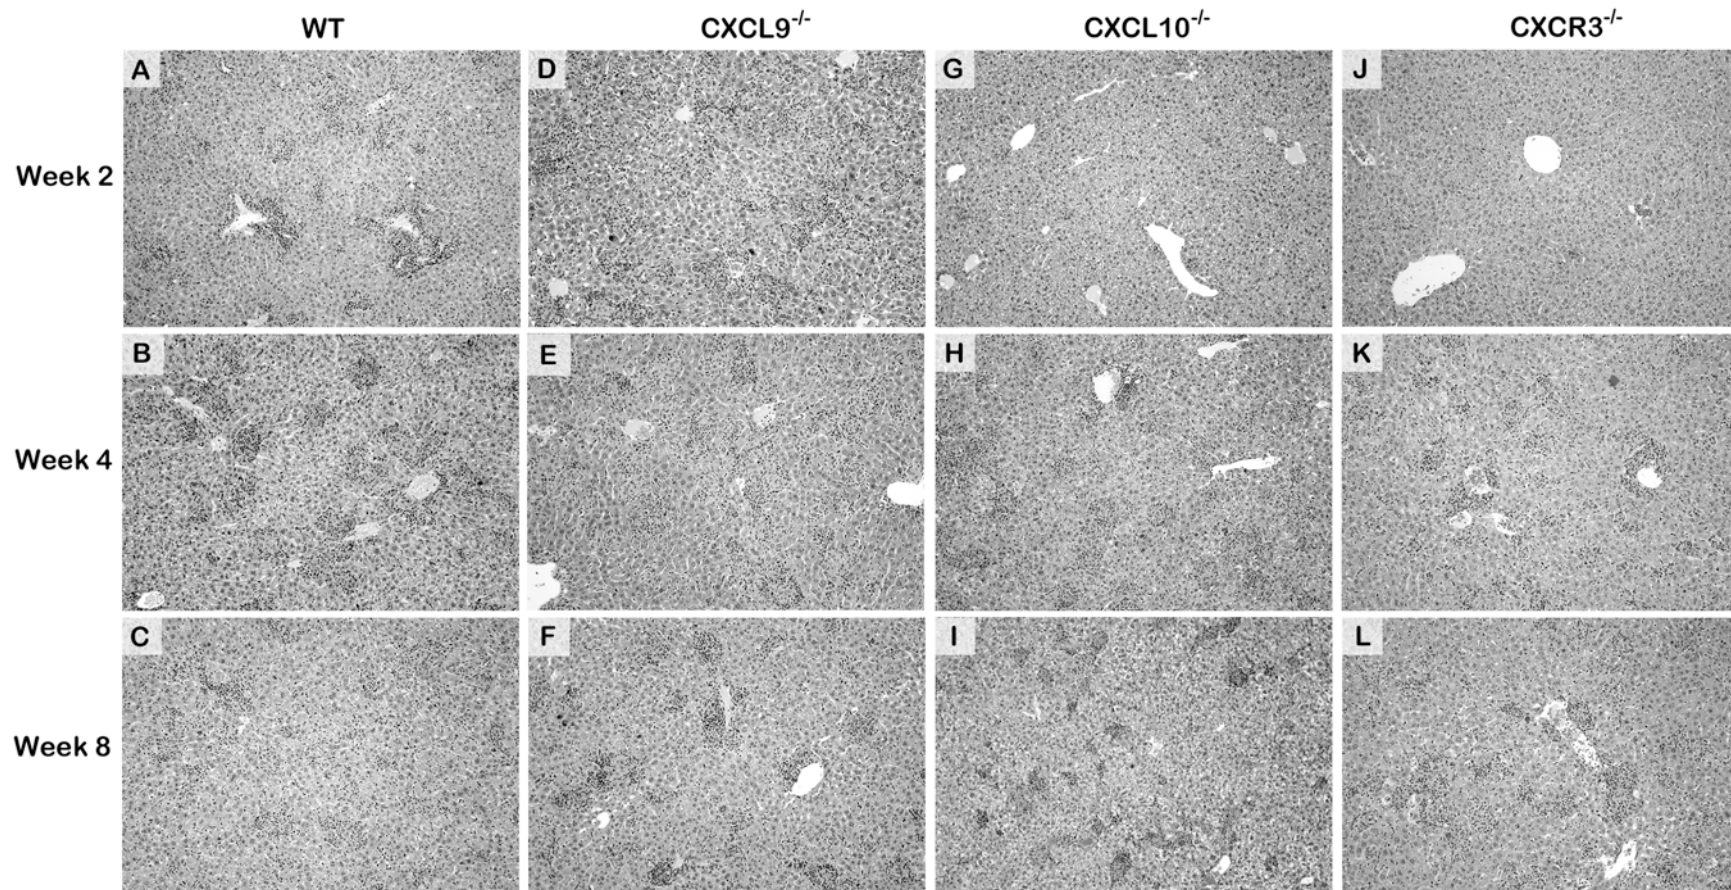

**Figure S5.** Low-power photomicrographs of livers of WT (A-C), CXCL9<sup>-/-</sup> (D-F), CXCL10<sup>-/-</sup> (G-I) and CXCR3<sup>-/-</sup> mice (J-L) 2-8 weeks after *L. donovani* infection. The WT mice shown were infected in parallel with CXCL9<sup>-/-</sup> mice (histologic reactions were similar in WT mice infected in parallel with CXCL10<sup>-/-</sup> and CXCR3<sup>-/-</sup> mice). Compared to inflammatory granulomatous responses in WT mice, photomicrographs demonstrate: (i) an accentuated early reaction at week 2 in CXCL9<sup>-/-</sup> mice (D), and in contrast, (ii) near-absent inflammatory reactions in CXCL10<sup>-/-</sup> and CXCR3<sup>-/-</sup> mice at week 2 (G, J). By weeks 4-8, mononuclear cell recruitment is expressed in both CXCL10<sup>-/-</sup> (H, I) and CXCR3<sup>-/-</sup> mice (K, L). (Original magnification, x100.)

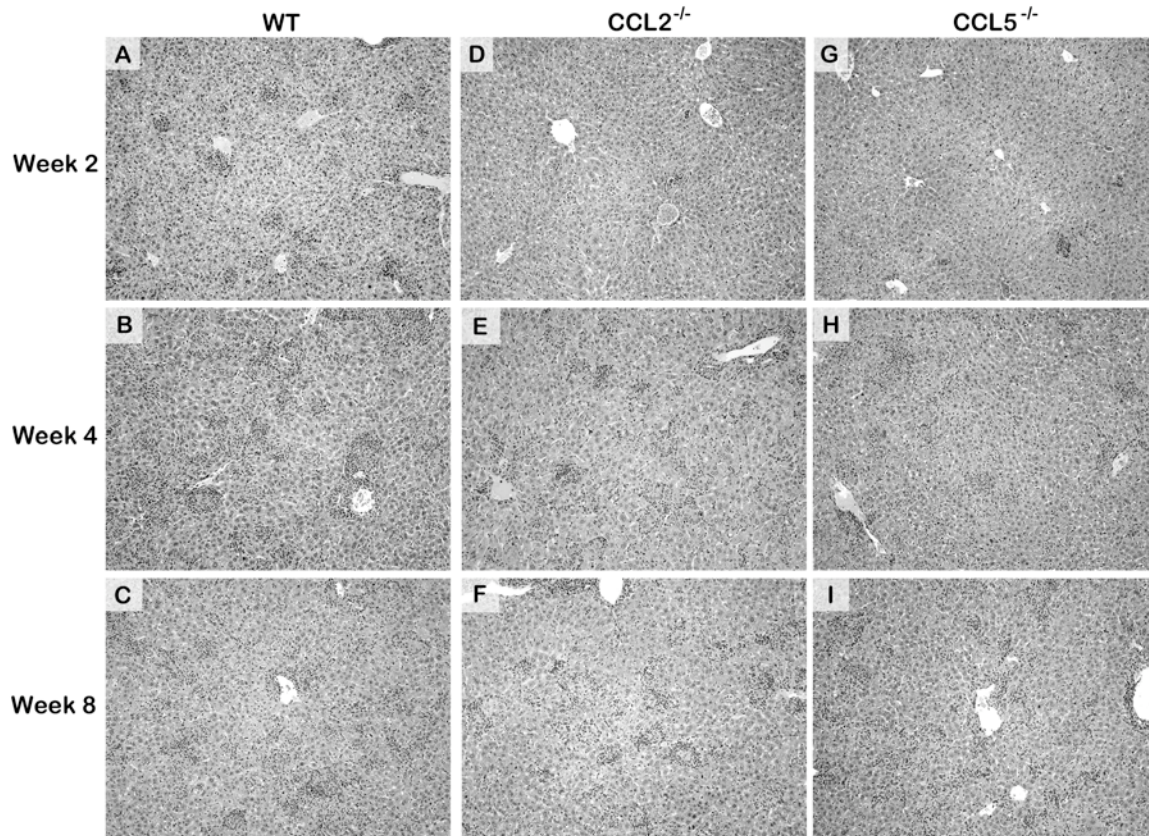

**Figure S6.** Low-power photomicrographs of livers of WT (A-C), CCL2<sup>-/-</sup> (D-F) and CCL5<sup>-/-</sup> (G-I) 2-8 weeks after *L. donovani* infection. WT mice shown were infected in parallel with the CCL2<sup>-/-</sup> mice (histologic reactions were similar in WT mice infected in parallel with CCL5<sup>-/-</sup> mice). Compared to inflammatory granulomatous responses in WT mice, photomicrographs demonstrate in both CCL2<sup>-/-</sup> and CCL5<sup>-/-</sup> mice: (i) overtly-deficient mononuclear cell recruitment at week 2 (D, H) with impaired responses at week 4 (E, H), but (ii) established inflammation and granuloma assembly by week 8 (F, I). (Original magnification, x100.)

Table S1. Primer Sequences Used for RT-PCR.

| Gene   | Forward Primer              | Reverse Primer              |
|--------|-----------------------------|-----------------------------|
| CXCL9  | 5'-TCATCTTCCTGGAGCAGTGT-3'  | 5'-TCTCCGTTCTTCAGTGTAGC-3'  |
| CXCL10 | 5'-GCTGCAACTGCATCCATATC-3'  | 5'-CCGGATTCAGACATCTCTGC-3'  |
| CXCL13 | 5'-CTCTCCAGGCCACGGTATTC-3'  | 5'-GCAGCTCTTCTCTTACTCAC-3'  |
| CXCL16 | 5'-GCAGTGTCGCTGGAAGTTGT-3'  | 5'-GTGCTCGTGTCCGAAGGTGT-3'  |
| CCL2   | 5'-ACAGTTGCCGGCTGGAGAAT-3'  | 5'-CTGCTGCTGGTGATCCTCTT-3'  |
| CCL5   | 5'-ATATGGCTCGGACACCACTC-3'  | 5'-CACACTTGGCGGTTCTTCG-3'   |
| GADPH  | 5'-AACTTTGGCATTGTGGAAGG -3' | 5'-ACACATTGGGGGTAGGAACA -3' |

Table S2. Chemokine and Chemokine Receptor Gene Expression in *L. donovani*-Infected Livers.\*

| Gene                             | Fold-Increase in Expression |      |                                   |     |
|----------------------------------|-----------------------------|------|-----------------------------------|-----|
|                                  | WT Mice                     |      | IFN- $\gamma$ <sup>-/-</sup> Mice |     |
|                                  | Day 14                      | 21   | Day 14                            | 21  |
| <b>C-X-C Chemokines</b>          |                             |      |                                   |     |
| CXCL7                            | 6.0                         | 8.4  | 0.9                               | 1.2 |
| CXCL9 <sup>+</sup>               | 19.1                        | 33.6 | 1.5                               | 2.3 |
| CXCL10 <sup>+</sup>              | 98.0                        | 257  | 3.3                               | 3.6 |
| CXCL11                           | 2.7                         | 5.6  | 0.9                               | 0.7 |
| CXCL13 <sup>+</sup>              | 13.3                        | 81.4 | 1.5                               | 3.7 |
| CXCL16 <sup>+</sup>              | 3.8                         | 11.6 | 1.4                               | 1.1 |
| <b>C-C Chemokines</b>            |                             |      |                                   |     |
| CCL2 <sup>+</sup>                | 3.9                         | 28.9 | 2.5                               | 1.9 |
| CCL5 <sup>+</sup>                | 4.3                         | 34.2 | 1.0                               | 2.2 |
| CCL6                             | 2.0                         | 7.5  | 1.1                               | 1.5 |
| CCL8                             | 7.8                         | 57.0 | 6.6                               | 9.7 |
| CCL19                            | 2.7                         | 4.3  | 0.8                               | 1.0 |
| <b>C-X-C Chemokine Receptors</b> |                             |      |                                   |     |
| CXCR3 <sup>+</sup>               | 1.3                         | 11.2 | 0.8                               | 0.9 |
| CXCR4 <sup>+</sup>               | 19.6                        | 47.1 | 0.5                               | 1.0 |
| CXCR6 <sup>+</sup>               | 10.8                        | 46.8 | 4.6                               | 4.1 |
| <b>C-C Chemokine Receptors</b>   |                             |      |                                   |     |
| CCR2 <sup>+</sup>                | 4.7                         | 15.9 | 2.1                               | 1.3 |

|                                 |      |      |     |     |
|---------------------------------|------|------|-----|-----|
| CCR3 <sup>+</sup>               | 34.9 | 46.7 | 0.6 | 0.6 |
| CCR5 <sup>+</sup>               | 4.3  | 13.1 | 0.5 | 1.2 |
| CCR9                            | 5.0  | 11.6 | 2.1 | 2.0 |
| <b>CX3C Chemokine Receptors</b> |      |      |     |     |
| CX3CR1                          | 5.0  | 5.7  | 1.1 | 1.4 |

---

\*DNA microarray analysis of liver tissue from WT and IFN- $\gamma$ <sup>-/-</sup> mice 14 and 21 days after infection. Results, from a single experiment in which samples from 4-5 mice per group were pooled at each time point, indicate fold-increase in gene expression vs. pooled liver samples from 4-5 uninfected WT or IFN- $\gamma$ <sup>-/-</sup> mice.

<sup>†</sup>Gene expression on day 14 or day 21 designated as both prominent and IFN- $\gamma$ -regulated (see text for definitions).

Table S3. Response to Pentavalent Antimony (Sb) Chemotherapy.\*

| Mice                         | Sb | Liver Parasite Burden (LDU) |                     | %       |
|------------------------------|----|-----------------------------|---------------------|---------|
|                              |    | Day 14                      | Day 21 <sup>+</sup> | Killing |
| <b>A. WT</b>                 | 0  | 1999 ± 201                  | 2256 ± 190          | 0       |
|                              | +  |                             | 200 ± 32            | 90      |
| IFN- $\gamma$ <sup>-/-</sup> | 0  | 3561 ± 288                  | 4360 ± 399          | 0       |
|                              | +  |                             | 3701 ± 357          | 0       |
| <b>B. WT</b>                 | 0  | 2418 ± 171                  | 2555 ± 198          | 0       |
|                              | +  |                             | 197 ± 45            | 92      |
| CXCL9 <sup>-/-</sup>         | 0  | 1887 ± 254                  | 1934 ± 154          | 0       |
|                              | +  |                             | 54 ± 11             | 97      |
| <b>C. WT</b>                 | 0  | 1788 ± 159                  | 1820 ± 127          | 0       |
|                              | +  |                             | 120 ± 22            | 93      |
| CXCL10 <sup>-/-</sup>        | 0  | 1152 ± 77                   | 1336 ± 88           | 0       |
|                              | +  |                             | 110 ± 18            | 90      |
| <b>D. WT</b>                 | 0  | 2266 ± 219                  | 2757 ± 254          | 0       |
|                              | +  |                             | 212 ± 30            | 93      |
| CXCR3 <sup>-/-</sup>         | 0  | 3048 ± 124                  | 3090 ± 174          | 0       |
|                              | +  |                             | 158 ± 47            | 95      |
| <b>E. WT</b>                 | 0  | 1842 ± 31                   | 2398 ± 254          | 0       |
|                              | +  |                             | 195 ± 18            | 89      |
| CXCL13 <sup>-/-</sup>        | 0  | 2088 ± 262                  | 2149 ± 126          | 0       |
|                              | +  |                             | 96 ± 32             | 95      |

|                      |   |                |                |    |
|----------------------|---|----------------|----------------|----|
| <b>F. WT</b>         | 0 | 2037 $\pm$ 160 | 2215 $\pm$ 98  | 0  |
|                      | + |                | 106 $\pm$ 50   | 95 |
| CXCR6 <sup>-/-</sup> | 0 | 2697 $\pm$ 296 | 2802 $\pm$ 222 | 0  |
|                      | + |                | 102 $\pm$ 51   | 96 |
| <b>G. WT</b>         | 0 | 2533 $\pm$ 205 | 2587 $\pm$ 201 | 0  |
|                      | + |                | 231 $\pm$ 87   | 91 |
| CCL2 <sup>-/-</sup>  | 0 | 3254 $\pm$ 303 | 3928 $\pm$ 331 | 0  |
|                      | + |                | 214 $\pm$ 39   | 93 |
| <b>H. WT</b>         | 0 | 2438 $\pm$ 221 | 2555 $\pm$ 122 | 0  |
|                      | + |                | 270 $\pm$ 58   | 92 |
| CCL5 <sup>-/-</sup>  | 0 | 2489 $\pm$ 181 | 3772 $\pm$ 382 | 0  |
|                      | + |                | 87 $\pm$ 21    | 97 |

---

\*2 weeks after infection (day +14), mice received no treatment or a single IP injection of Sb (500 mg/kg). Day +21 LDU in treated mice were compared to day +14 LDU to determine parasite killing (% reduction in LDU on day +21). Results (mean  $\pm$  SEM values) are from 2-3 experiments for each gene-deficient group (6-12 mice per group per time point), infected in parallel with a similar number of WT controls.

Table S4. Parasite Killing at Week 4.\*

| Mice                                                  | % Parasite Killing at Week 4 |            |
|-------------------------------------------------------|------------------------------|------------|
|                                                       | Chemokine-Deficient          | WT Control |
| CXCL9 <sup>-/-</sup>                                  | 44                           | 26         |
| CXCL10 <sup>-/-</sup>                                 | 49                           | 33         |
| CXCL13 <sup>-/-</sup>                                 | 51                           | 46         |
| CXCR6 <sup>-/-</sup> (for CXCL16 <sup>-/-</sup> mice) | 29                           | 32         |
| CCL2 <sup>-/-</sup>                                   | 34                           | 54         |
| CCL5 <sup>-/-</sup>                                   | 13                           | 44         |

\*Calculated using the week 3 and week 4 liver parasite burdens (mean LDU) shown in Figures 2, 3 and S2 for chemokine-deficient mice and WT controls infected in parallel.

% parasite killing = week 3 LDU – week 4 LDU/week 3 LDU.
